# Supplementary material for: Intake of cookies made with buriti oil (Mauritia flexuosa) improves vitamin A status and lipid profiles in young rats
Source: Royal Society of Chemistry journal article supplement (doi:10.1039/c6fo00770h), 2016-01-01
Supplement: c6fo00770h5.pdf [file c6fo00770h5.pdf]

## Supplementary Figures

**Figure S1.** Serum retinol of rats fed cookies made with buriti oil (BOC).

**Figure S2.** Serum retinol of rats fed cookies made with soybean oil (SOC).

**Figure S3.** Fatty acids quantified in cookies made with buriti oil (BOC).

**Figure S4.** Fatty acids quantified in cookies made with soybean oil (SOC).
