# Supplementary figures and images for: Intake of cookies made with buriti oil (Mauritia flexuosa) improves vitamin A status and lipid profiles in young rats
Source: Royal Society of Chemistry journal article supplement (doi:10.1039/c6fo00770h), 2016-01-01

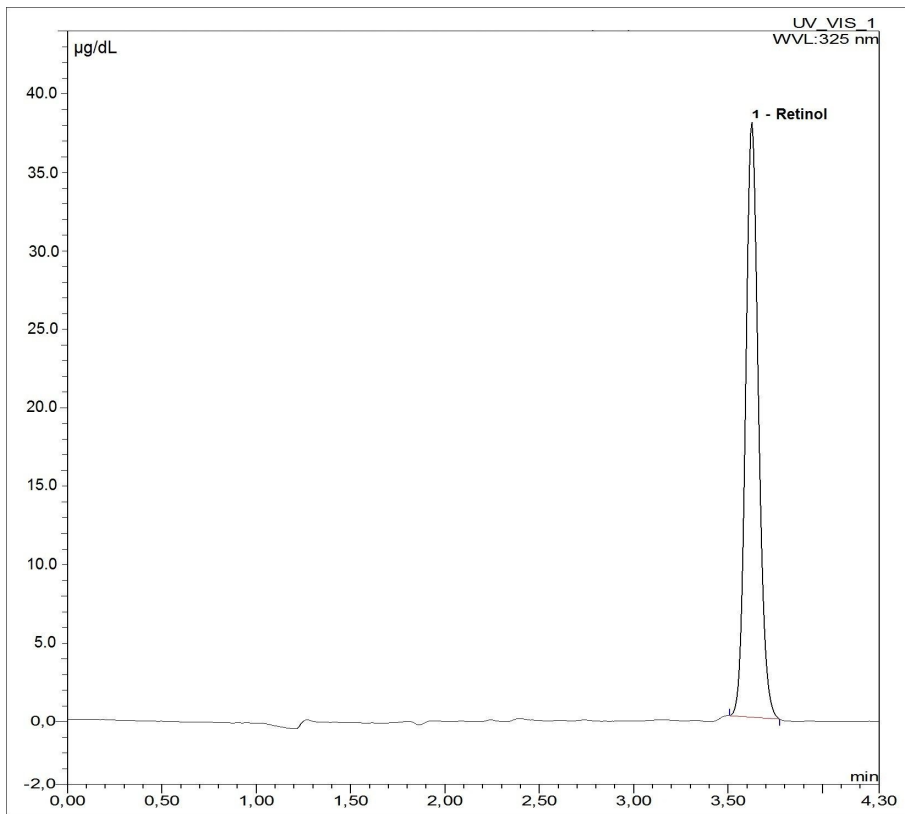

Supplement: c6fo00770h1.pdf [file c6fo00770h1.pdf]

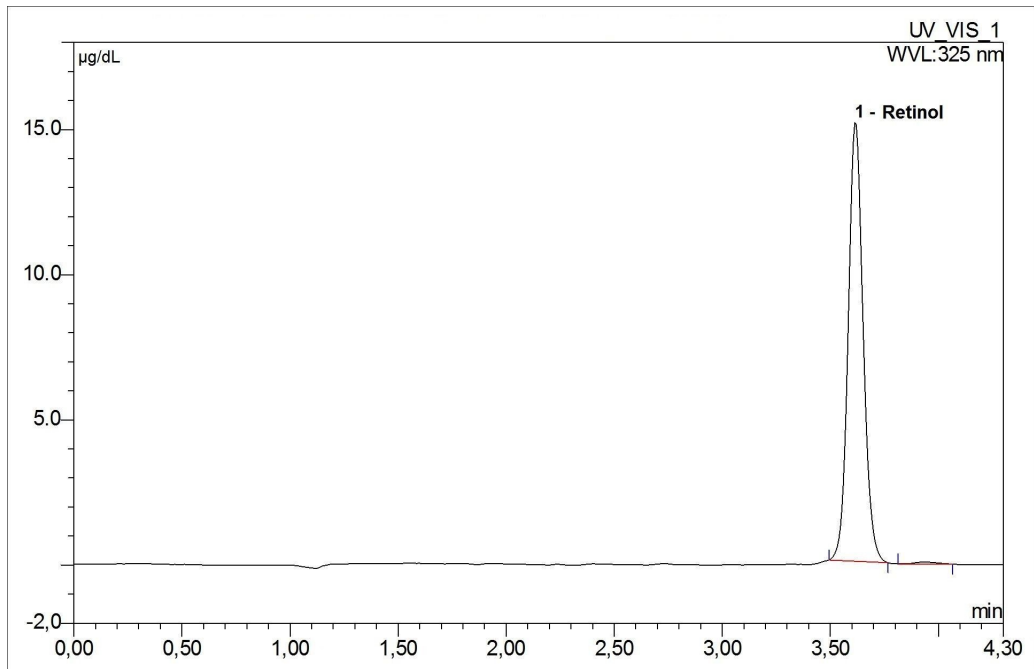

Supplement: c6fo00770h2.pdf [file c6fo00770h2.pdf]

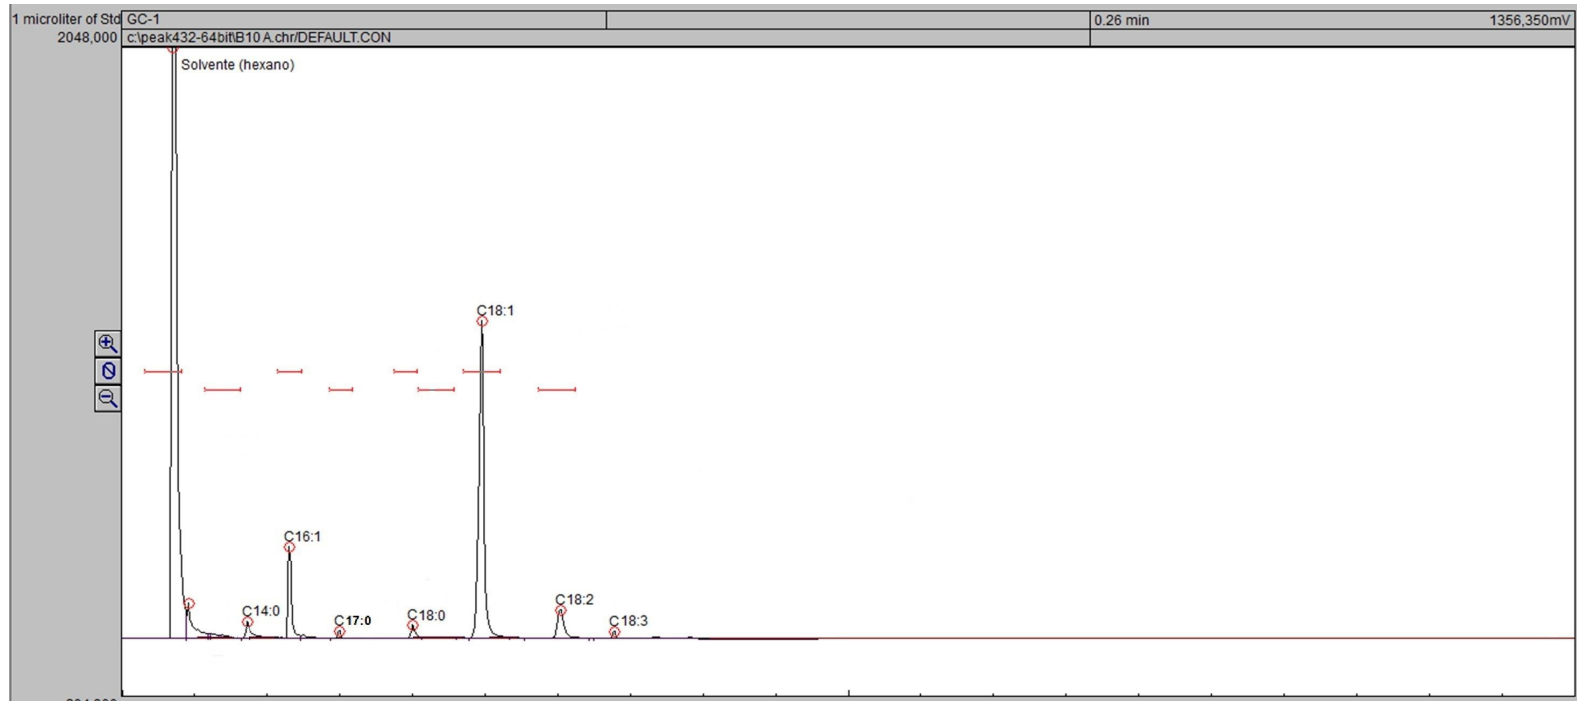

Supplement: c6fo00770h3.pdf [file c6fo00770h3.pdf]

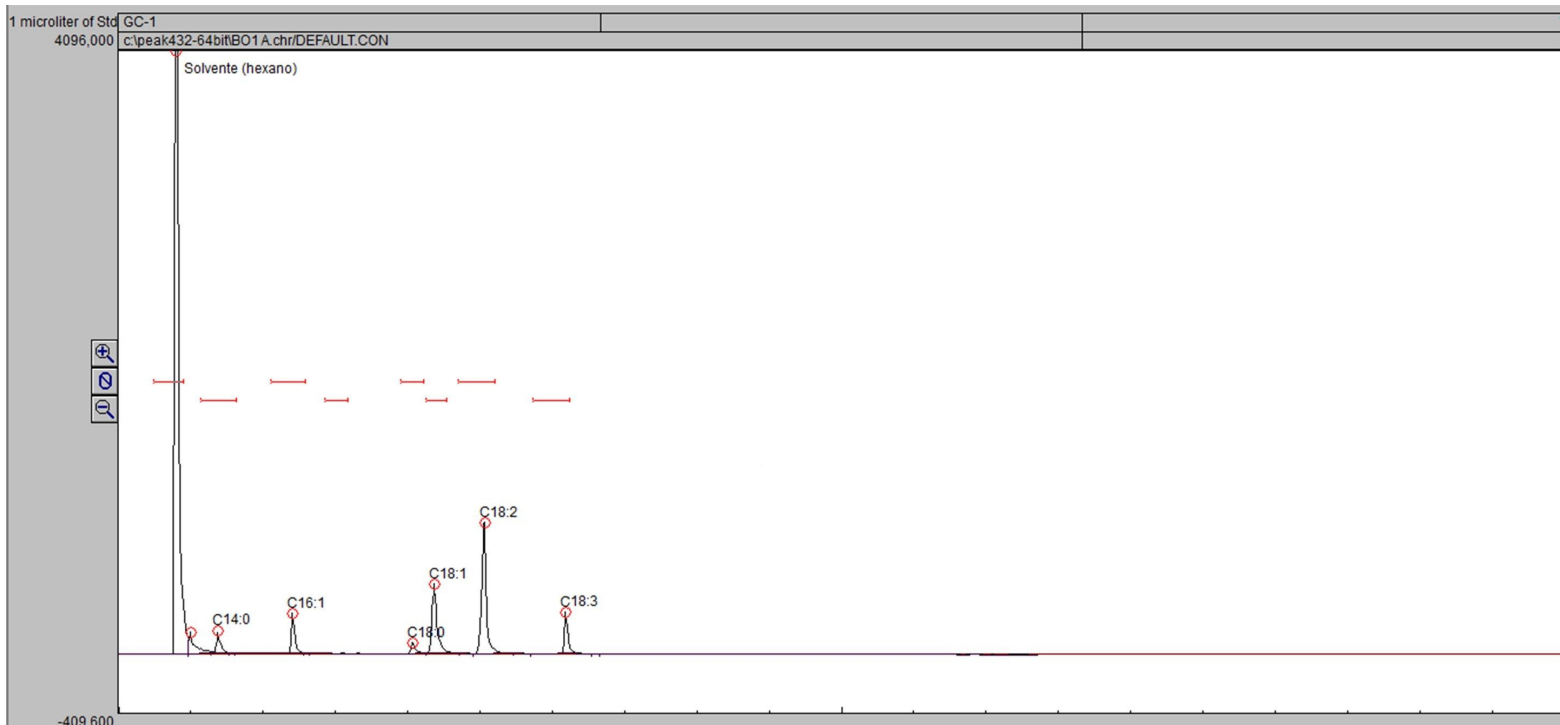

Supplement: c6fo00770h4.pdf [file c6fo00770h4.pdf]
